# Supplementary material for: Description of the unusual digestive tract of Platax orbicularis and the potential impact of Tenacibaculum maritimum infection
Source: PeerJ. 2020 Sep 24;8:e9966. doi: 10.7717/peerj.9966 (PMC7520087; doi:10.7717/peerj.9966)
Supplement: Supplemental Information 3 — Longitudinal (ML), circular (MC) and total (MT) muscle layer thickness (in µm) have been assessed on slides stained with HES from section 4 to 10. Columns 3 to 5 correspond to the data used for the statistical analysis and presented in the Figs. 6C, 6D and 6E for the section 6 only. [file peerj-08-9966-s003.xlsx]

## Sheet: Feuil1
Treatment	Section	Fish number	ML	MC	MT
Non-infected	4	1	15.45	18.86	34.31
Non-infected	4	2	17.57	27.16	44.72
Non-infected	4	3	13.60	18.45	32.04
Non-infected	4	4	13.00	22.84	35.84
Infected	4	1	14.93	15.75	30.68
Infected	4	2	19.23	21.36	40.59
Infected	4	3	12.20	14.07	26.26
Infected	4	4	18.34	25.24	43.59
Non-infected	5	1	15.8	21.7	37.5
Non-infected	5	2	12.3	14.33	26.63
Non-infected	5	3	14.17	16.37	30.53
Infected	5	1	13.83	10.27	24.1
Infected	5	2	15.47	17.47	32.93
Infected	5	3	9.97	10.97	20.93
Infected	5	4	15.2	16.83	32.03
Non-infected	6	1	13.66	17.48	31.14
Non-infected	6	2	18.14	21.68	39.81
Non-infected	6	3	17.06	18.47	35.53
Non-infected	6	4	16.53	18.65	35.17
Infected	6	1	10.51	12.21	22.71
Infected	6	2	12.42	12.21	24.64
Infected	6	3	12.34	13.41	25.75
Infected	6	4	12.08	12.94	25.02
Non-infected	7	1	13.14	16.1	29.24
Non-infected	7	2	11.93	13.43	25.36
Non-infected	7	3	10.56	13.27	23.83
Non-infected	7	4	14.78	17.63	32.41
Infected	7	1	9.77	10.5	20.27
Infected	7	2	10.97	11.47	22.43
Infected	7	3	12.02	15.4	27.42
Infected	7	4	12.17	11.87	24.03
Non-infected	8	1	9.57	13.13	22.7
Non-infected	8	2	11.93	16.13	28.07
Non-infected	8	3	10.77	12.40	23.17
Non-infected	8	4	12.5	16.83	29.33
Infected	8	1	12.5	13.53	26.03
Infected	8	2	10.27	15.87	26.13
Infected	8	3	10.83	11.83	22.67
Infected	8	4	12.17	14.03	26.2
Non-infected	9	1	13.9	12	25.9
Non-infected	9	2	7.8	6.36	14.17
Non-infected	9	3	18.3	18.467	36.77
Non-infected	9	4	21.63	21.13	42.77
Infected	9	1	11.77	12.667	24.43
Infected	9	2	17.90	14.03	31.93
Infected	9	3	12.03	13.73	25.77
Infected	9	4	16.7	18.7	35.40
Non-infected	10	1	55.6	108.77	164.37
Non-infected	10	2	44.07	96.23	140.30
Non-infected	10	3	44.9	106.87	151.77
Non-infected	10	4	48.8	163.6	212.40
Infected	10	1	78.27	154.6	232.87
Infected	10	2	46.43	145.53	191.97
Infected	10	3	53.20	126.23	179.43
Infected	10	4	49.87	139.97	189.83
