# Supplementary material for: Description of the unusual digestive tract of Platax orbicularis and the potential impact of Tenacibaculum maritimum infection
Source: PeerJ. 2020 Sep 24;8:e9966. doi: 10.7717/peerj.9966 (PMC7520087; doi:10.7717/peerj.9966)
Supplement: Supplemental Information 4 — Proportions of acidic mucocytes (in %) were measured on different histological slides stained with the PAS A.B pH 2.5. Column 4 corresponds to the data used for the statistical analysis and presented in the Figs. 8A and 8B. [file peerj-08-9966-s004.xlsx]

## Sheet: Global
Treatment	Section	Fish number	Mean proportion acidic mucocyte
Non-infected	3	1	52.38
Non-infected	3	2	47.52
Non-infected	3	3	51.16
Non-infected	3	4	33.33
Infected	3	1	51.65
Infected	3	2	66.10
Infected	3	3	82.76
Infected	3	4	50
Non-infected	4	1	39.33
Non-infected	4	2	47.41
Non-infected	4	3	39.06
Non-infected	4	4	36.36
Infected	4	1	69.77
Infected	4	2	69.23
Infected	4	3	80
Infected	4	4	84.09
Non-infected	5	1	51.47
Non-infected	5	2	71.43
Non-infected	5	3	56.57
Infected	5	1	82.98
Infected	5	2	81.82
Infected	5	3	84.38
Infected	5	4	73.47
