# Supplementary material for: Description of the unusual digestive tract of Platax orbicularis and the potential impact of Tenacibaculum maritimum infection
Source: PeerJ. 2020 Sep 24;8:e9966. doi: 10.7717/peerj.9966 (PMC7520087; doi:10.7717/peerj.9966)
Supplement: Supplemental Information 5 — Enterocyte length (in µm) have been assessed on slides stained with HES. Column 4 corresponds to the data used for the statistical analysis and presented in the Fig. 9. [file peerj-08-9966-s005.xlsx]

## Sheet: Feuil1
Treatment	Section	Fish number	Enterocyte length (EL)
Non-infected	3	1	52.5
Non-infected	3	2	48.49
Non-infected	3	3	54.17
Infected	3	1	41.58
Infected	3	2	43.51
Infected	3	3	38.41
Infected	3	4	36.53
Non-infected	4	1	52.57
Non-infected	4	2	53.16
Non-infected	4	3	64.45
Non-infected	4	4	64.34
Infected	4	1	49.86
Infected	4	2	44.03
Infected	4	3	40.42
Infected	4	4	44.16
Non-infected	5	1	62.39
Non-infected	5	2	56.43
Non-infected	5	3	61.92
Infected	5	1	49.75
Infected	5	2	54.08
Infected	5	3	34.41
Infected	5	4	35.56
Non-infected	6	1	50.89
Non-infected	6	2	55.10
Non-infected	6	3	55.91
Non-infected	6	4	56.26
Infected	6	1	46.34
Infected	6	2	50.81
Infected	6	3	38.43
Infected	6	4	30.8
Non-infected	7	1	45.43
Non-infected	7	2	46.41
Non-infected	7	3	50.25
Non-infected	7	4	54.76
Infected	7	1	36.44
Infected	7	2	44.64
Infected	7	3	35.00
Infected	7	4	29.82
Non-infected	8	1	30.37
Non-infected	8	2	38.76
Non-infected	8	3	41.67
Non-infected	8	4	41.16
Infected	8	1	46.07
Infected	8	2	35.24
Infected	8	3	39.88
Infected	8	4	32.97
Non-infected	9	1	35.35
Non-infected	9	2	37.67
Non-infected	9	3	42.79
Non-infected	9	4	42.04
Infected	9	1	43.33
Infected	9	2	38.08
Infected	9	3	35.4
Infected	9	4	35.06
Non-infected	10	1	32.2
Non-infected	10	2	37.3
Non-infected	10	3	32.35
Non-infected	10	4	38.02
Infected	10	1	41.45
Infected	10	2	41.8
Infected	10	3	37.38
Infected	10	4	43.36
